# Supplementary material
Source: PubMed Central journal article supplement (PMC4223211)
Supplement: mmc1.pdf [file mmc1.pdf]

# **Penetration of Cell Membranes and Synthetic Lipid Bilayers by Nanoprobes**

Matthew R. Angle,<sup>1,2</sup> Andrew Wang,<sup>1</sup> Aman Thomas,<sup>1</sup> Andreas T. Schaefer,<sup>2</sup> and Nicholas A. Melosh<sup>1,\*</sup>

<sup>1</sup>Department of Materials Science and Engineering, Stanford University, Stanford, California; and <sup>2</sup>Behavioural Neurophysiology, Max Planck Institute for Medical Research, Heidelberg, Germany

## Supporting Material:

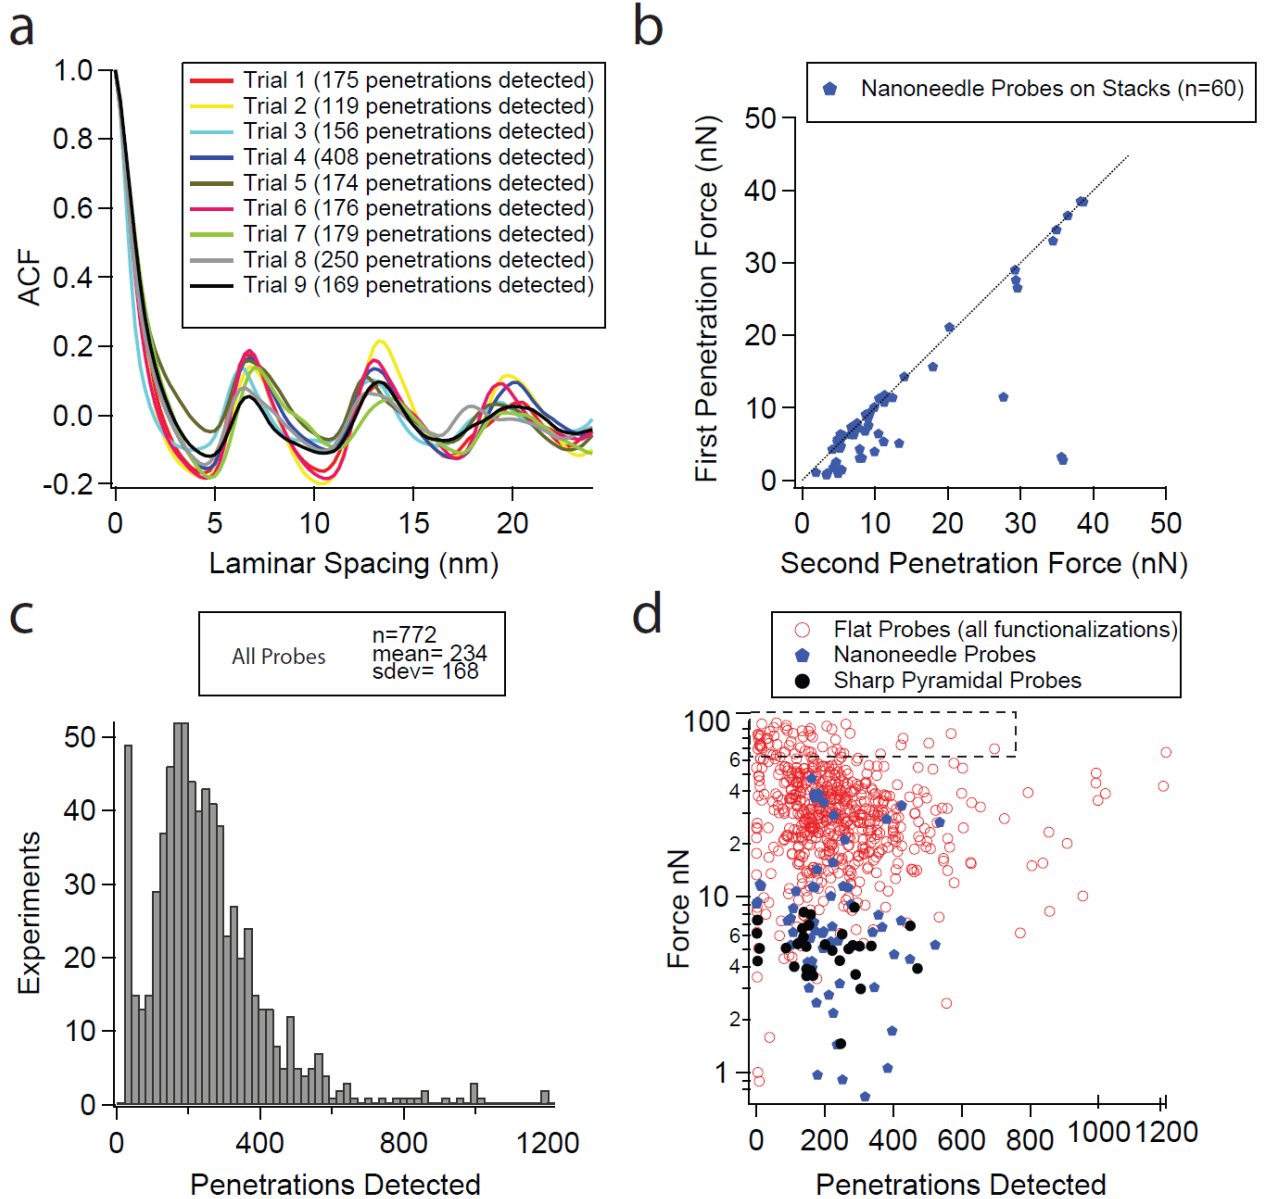

### Supplementary Figure 1: On Lipid Stacks

- a) Autocorrelation function for the tip position over time. Shows regular, laminar spacing between 6-7 nm. These 9 trials are representative of the entire dataset and were drawn from the nanoneedle experiments.
- b) Comparison of first and second breakthrough forces for all experiments performed in lipid stacks using nanoneedle probes. Second breakthrough forces were not analyzed for the other sets of experiments.
- c) Histogram of the number of penetrations detected in each lipid stack experiment for all lipid stack experiments (all probe types).
- d) Plot of penetration force versus number of penetrations. The variation in thickness has no obvious effect on penetration force. The boxed region indicates where the penetration force is very high. Some of these points may be underestimating the true thickness of the stack if the end-trigger  $\sim 100$  nN was reached prior to complete penetration of the stack. This shouldn't appreciably effect our conclusion that the stacks are  $\sim 200$  bilayers thick.

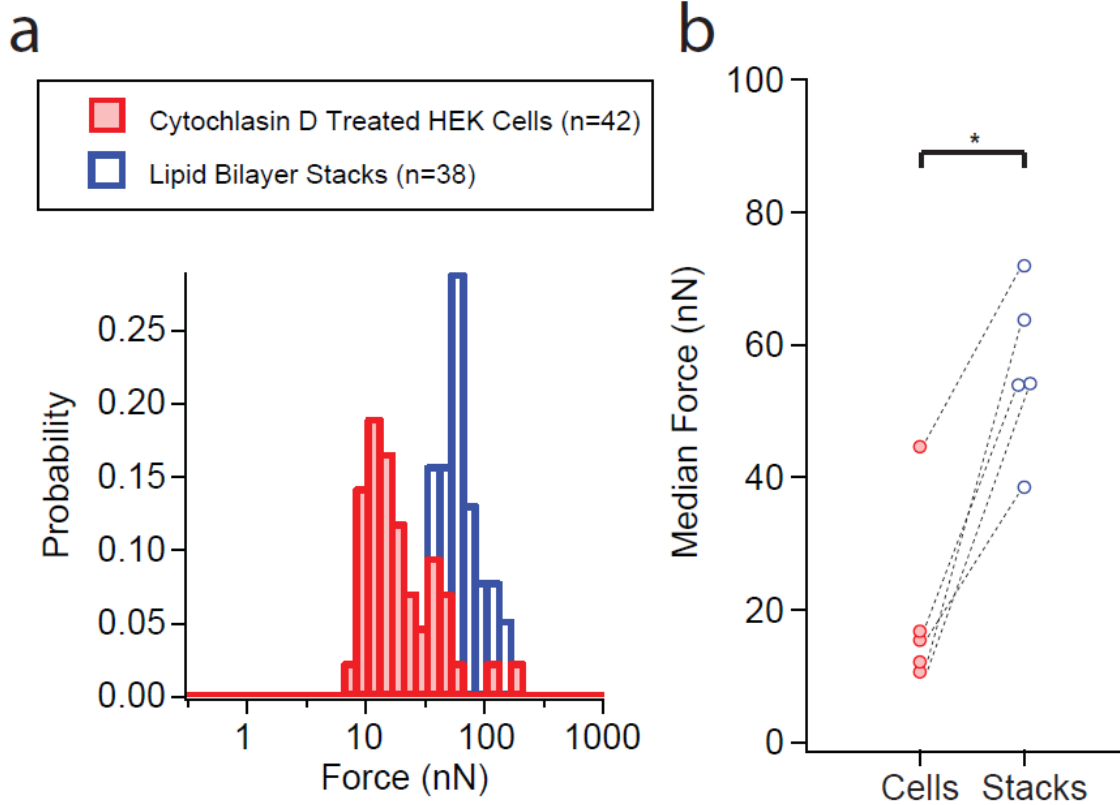

### Supplementary Figure 2: Synthetic Oligonucleotide

From a total of 5 functionalized tips.

(a) Histogram of all first penetration force in cells and lipid stacks.

(b) Pairwise Comparison of median penetration force in cells and lipid stacks for each tip. \*Paired T-test  $P < 0.005$ .

## **Supporting Table:**

The following table explains the details of the 18 functionalization reagents. It has been split onto two pages and color-coded for display in the merged document. Several of the cell-penetrating peptides were co-functionalized with mercaptopropanol as a competitor (see Concentration). The competitor concentration was based on titration experiments measuring the height of the nitrogen peak from x-ray photoelectron spectroscopy. Concentrations were chosen such that peptide density was non-saturating but  $> 50\%$ . The rationale for this was to prevent overpacking and steric hindrance. All references in the Supporting Table (1-9) appear elsewhere in the main text.

Supplementary Table 1. Functionalization Reagents for Modifying AFM Trip Surface Chemistry.

| Type           | Reagent                               | Sequence                                             | Source                                                  | Rationale/Description                                                                                              | Concentration                                              |
|----------------|---------------------------------------|------------------------------------------------------|---------------------------------------------------------|--------------------------------------------------------------------------------------------------------------------|------------------------------------------------------------|
| Peptide        | Pf-segment                            | KTNMKHMAGAAAGAVYGGIGGRSRGC                           | Lin et al 1997 [1]                                      | Membrane-inserting (Lin et al 1997) [1]                                                                            | 0.1 mg/mL                                                  |
|                | TMD_AR                                | LSVLRRAVQYLRSLRSGSGC                                 | (NP_758513)                                             | Homology to motif found by Cruz et al 2013 [3]                                                                     | 0.1 mg/mL                                                  |
|                | TMD_VTP                               | LLRGGPACGRLLRSGGC                                    | (NP_080282)                                             | Homology to motif found by Cruz et al 2013 [3]                                                                     | 0.1 mg/mL                                                  |
|                | TMD_Kchan                             | LLRAGKLLRLRPGSGC                                     | (NP_001177302)                                          | Homology to motif found by Cruz et al 2013 [3]                                                                     | 0.1 mg/mL                                                  |
|                | Melitin                               | GIGAVLKVYITGLPALISWIKRRKQQSGSGGC                     | Pubchem CID 16133648                                    | Membrane-inserting (Sessa 1969) [4]                                                                                | 0.1 mg/mL, Melitin with 150 $\mu$ M mercaptopropionol      |
|                | TAT                                   | CGGGRRKRRQR                                          | PM_12417587                                             | Known CPP (Fawcett 1994) [5]                                                                                       | 0.1 mg/mL, TAT with 1 mM mercaptopropionol                 |
|                | Penetratin                            | CGGGRQIKWFQNRMRKWK                                   | PM_16476052                                             | Known CPP (Derosi et al 1994) [6]                                                                                  | 0.1 mg/mL, Penetratin with 2 $\mu$ M mercaptopropionol     |
|                | MAP                                   | CGGKLLAKLAKALKAKLAKLA                                | PM_10323198                                             | Known CPP (Ochlik et al 1998) [7]                                                                                  | 0.1 mg/mL, MAP with 10 $\mu$ M mercaptopropionol           |
|                | Lear                                  | LSSLLSSLLSSLLSLGSGC                                  | Lear et al 1988 [2]                                     | Membrane-inserting (Lear et al 1988) [2]                                                                           | 0.1 mg/mL, MAP with 10 $\mu$ M mercaptopropionol           |
|                | Propincher                            | AGRWPPPPPPWRRRRGSGSGC                                |                                                         | Hydrophobic mismatch (de Jesus 2013) [8]                                                                           | 0.1 mg/mL, Lear with 1 $\mu$ M mercaptopropionol           |
|                | Flexpincher                           | AGRWLALALALALAWRRRRGSGSGC                            |                                                         | Hydrophobic mismatch (de Jesus 2013) [8]                                                                           | 0.1 mg/mL                                                  |
|                | Poly-Arginine                         | RRRC                                                 |                                                         | Interaction with phospholipids                                                                                     | 0.1 mg/mL, Poly-Arginine with 50 $\mu$ M mercaptopropionol |
| Type           | Reagent                               | Sequence                                             | Source                                                  | Rationale/Description                                                                                              | Concentration                                              |
| Nucleotide     | DNP-PEG-SPRM                          | XXXXXXXXXXWYWY (see Description)                     | Designed by M. Angle                                    | Ambiphilic Oligomer<br>X=DTPA (GlenRes10-1937-xx)<br>Y=DNP (GlenRes 10-1985-xx)<br>W=Spermine (GlenRes 10-1939-xx) | est. 200 $\mu$ M                                           |
| Type           | Reagent                               | Source                                               | Rationale/Description                                   | Concentration                                                                                                      |                                                            |
| Small molecule | Mercaptopropionol (CAS 19721-22-3)    | Sigma                                                | Hydrophillic                                            | 100 $\mu$ M mercaptopropionol                                                                                      |                                                            |
|                | Dodecanethiol (CAS 112-55-0)          | Sigma                                                | Hydrophobic                                             | 100 $\mu$ M 1-decanethiol                                                                                          |                                                            |
|                | Perfluorodecanethiol (CAS 34143-74-3) | Sigma                                                | Very Hydrophobic                                        | 100 $\mu$ M perfluorodecanethiol                                                                                   |                                                            |
|                | Phenylethanimethiol (CAS 4410-99-5)   | Sigma                                                | Aromatic                                                | 100 $\mu$ M phenylethanimethiol                                                                                    |                                                            |
|                | Benzophenonethiol                     | Synthesized by Herbert Zimmerman (MPlmF, Heidelberg) | Thiol analog of silane from Angle and Schaefer 2012 [9] | 100 $\mu$ M benzophenonethiol                                                                                      |                                                            |

## Supporting References:

1. Lin, M. C., T. Mirzabekov, and B. L. Kagan. 1997. Channel formation by a neurotoxic prion protein fragment. *The Journal of biological chemistry* 272:44-47.
2. Lear, J., Z. Wasserman, and W. DeGrado. 1988. Synthetic amphiphilic peptide models for protein ion channels. *Science* 240:1177-1181.
3. Cruz, J., M. Mihailescu, G. Wiedman, K. Herman, P. C. Searson, W. C. Wimley, and K. Hristova. 2013. A membrane-translocating peptide penetrates into bilayers without significant bilayer perturbations. *Biophys J* 104:2419-2428.
4. Sessa, G., J. H. Freer, G. Colacicco, and G. Weissmann. 1969. Interaction of a Lytic Polypeptide, Melittin, with Lipid Membrane Systems. *Journal of Biological Chemistry* 244:3575-3582.
5. Fawell, S., J. Seery, Y. Daikh, C. Moore, L. L. Chen, B. Pepinsky, and J. Barsoum. 1994. Tat-mediated delivery of heterologous proteins into cells. *Proceedings of the National Academy of Sciences* 91:664-668.
6. Derossi, D., A. H. Joliot, G. Chassaing, and A. Prochiantz. 1994. The third helix of the Antennapedia homeodomain translocates through biological membranes. *Journal of Biological Chemistry* 269:10444-10450.
7. Oehlke, J., A. Scheller, B. Wiesner, E. Krause, M. Beyermann, E. Klauschenz, M. Melzig, and M. Bienert. 1998. Cellular uptake of an  $\alpha$ -helical amphipathic model peptide with the potential to deliver polar compounds into the cell interior non-endocytically. *Biochimica et Biophysica Acta (BBA) - Biomembranes* 1414:127-139.
8. de Jesus, A. J., and T. W. Allen. 2013. The role of tryptophan side chains in membrane protein anchoring and hydrophobic mismatch. *Biochimica et biophysica acta* 1828:864-876.
9. Angle, M. R., and A. T. Schaefer. 2012. Neuronal recordings with solid-conductor intracellular nanoelectrodes (SCINEs). *PLoS ONE* 7.
